# Supplementary material for: New Insight into Muscle-Type Cofilin (CFL2) as an Essential Mediator in Promoting Myogenic Differentiation in Cattle
Source: MDPI journal article supplement (doi:10.3390/bioengineering9120729), 2022-11-25
Supplement: s1 [file s1]

### Supplementary Data: Overexpression or Knock-down Vector Construction of CFL2

We designed and synthesized *CFL2* overexpression primers containing *KpnI* and *HindIII* (TaKaRa, Dalian, China) restriction sites, the coding sequences of *CFL2* were subcloned into the pAdTrack-CMV (Miaoling bio, Wuhan, China) plasmid vector to construct the recombinant shuttle vector pAdTrack/CMV-CFL2. Then, this vector was homologously recombined with plasmid pAdEasy-1 to generate an adenoviral plasmid in BJ5183 (Miaoling bio, Wuhan, China) cells. The adenoviral plasmids linearized by *PacI* (TaKaRa, Dalian, China) were transfected into 293A cells to generate the adenovirus pAdEasy-1/pAdtrack-CMV-CFL2 (CFL2-CMV).

The BlockiT shRNA interference system was used to design and synthesize two pairs of primers for the *CFL2* gene (shCFL2-1F, shCFL2-1R, shCFL2-2F, shCFL2-2R) and one pair of primers for the negative control (NC, shRNA-NC-F and shRNA-NC-R). All primer sequences containing *BamHI* and *HindIII* (TaKaRa, Dalian, China) restriction sites. The oligonucleotides were cloned into the pENTR/CMV-GFP/U6 vector (Miaoling bio, Wuhan, China) to construct shuttle vectors pENTR/CMV-GFP/U6-shCFL2-1 and pENTR/CMV-GFP/U6-shCFL2-2 and then recombined with the adenovirus backbone vector pAD/PL-DEST (Miaoling bio, Wuhan, China) to produce recombinant vectors pAD/PL-DEST/CMV-GFP/U6-shCFL2-1 (shCFL2-1) and pAD/PL-DEST/CMV-GFP/U6-shCFL2-2 (shCFL2-2).

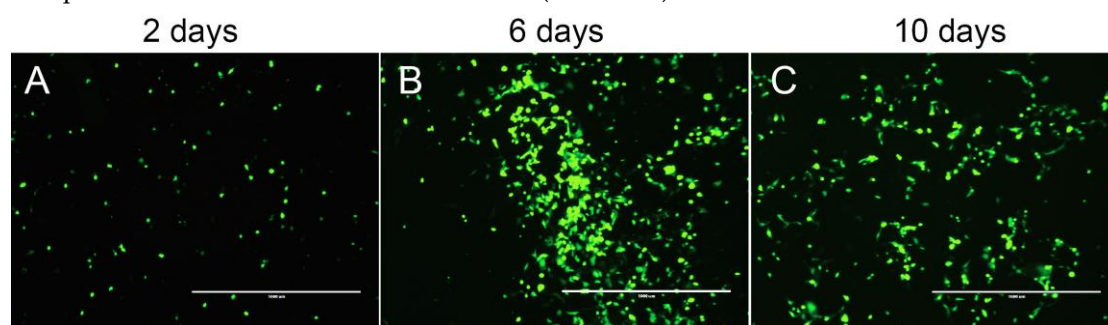

**Figure S1.** Production of CFL2-CMV recombinant adenovirus in 293A cells. *Pac I*-digested pAdEasy-GFP-CFL2 was transfected into 293A cells and GFP expression was visualized by fluorescence microscopy at the indicated times thereafter. Comet-like adenovirus-producing foci became apparent after 6 days. 80% cells became round and could receive virus after 10 days.

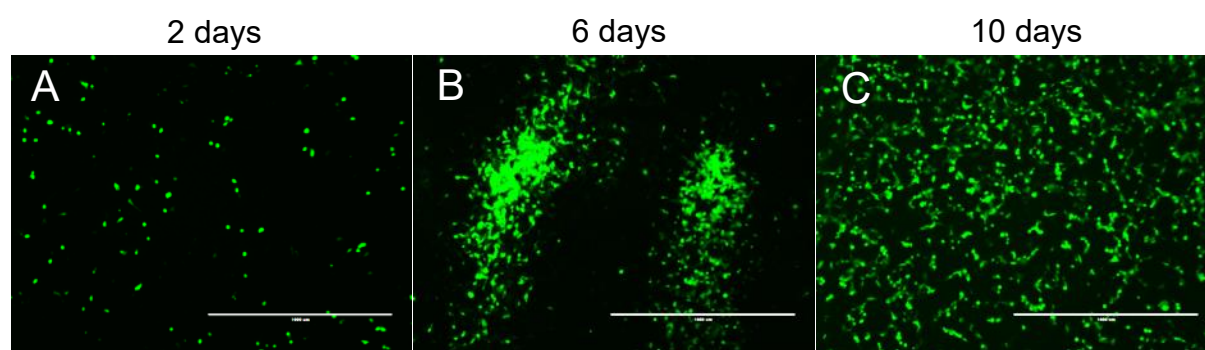

**Figure S2.** Production of shCFL2-1 recombinant adenovirus in 293A cells. *Pac I*-digested pAdEasy-GFP-shCFL2-2 was transfected into 293A cells and GFP expression was visualized by fluorescence microscopy at the indicated times thereafter. Comet-like adenovirus-producing foci became apparent after 6 days. 80% cells became round and could receive virus after 10 days.

**Supplementary Data: The published miRNAs to skeletal muscle myoblast development in cattle**

**Table S1.** The published miRNAs to skeletal muscle myoblast development in cattle

| Name            | Target gene           | Associated phenotype                                                        | References PMID |
|-----------------|-----------------------|-----------------------------------------------------------------------------|-----------------|
| Bta-miR-1       | HDAC4/LOC536229       | Skeletal muscle satellite cell myogenic differentiation                     | 26424132        |
| Bta-miR-107     | Wnt3a                 | Suppress cell differentiation and did not affect cell proliferation         | 29858062        |
| Bta-miR-125b    | IGF2                  | Sponged by lncMD to promote myoblast differentiation                        | 27589905        |
| Bta-miR-182     | CFL1                  | Promoted myoblast differentiation                                           | 35627108        |
| Bta-miR-206     | HDAC4/LOC536229       | Skeletal muscle satellite cell myogenic differentiation                     | 26424132        |
| Bta-miR-365-3p  | AVCR1                 | Promoted myoblast differentiation and inhibited proliferation               | 33431058        |
| Bta-miR-378a-3p | HDAC4                 | Promoted myoblast differentiation and inhibited proliferation               | 27661135        |
| Bta-miR-744     | Wnt5a/CaMKII $\delta$ | Promoted skeletal muscle cell proliferation while inhibited differentiation | 31051333        |
| Bta-miR-885     | MYOD1                 | Promote proliferation but inhibit differentiation                           | 331985035       |

**Supplementary Data: Western blot and COBRA**

Total proteins were extracted from cells using radio immunoprecipitation assay (RIPA) lysis buffer containing 1 mM phenylmethylsulfonyl fluoride (PMSF) (Solarbio, Beijing, China). Proteins were measured and adjusted by using the BCA protein assay kit (MultiScience, Hangzhou, China) and denatured with 5×SDS loading buffer (Beyotime, Shanghai, China) at 98 °C for 10 min.

The COBRA (Combined bisulfite restriction analysis) technique is a variation of bisulfite sequencing and combines bisulfite conversion-based polymerase chain reaction with restriction digestion. The PCR products hold a natural *HinfI* endonuclease restriction site (G<sup>A</sup>NTC) when the CpG dinucleotides are methylated; otherwise, the site cannot be digested if one or more CpG dinucleotides within its recognition sequence are unmethylated. During sodium bisulfite treatment, unmethylated cytosine residues were converted to "T", whereas methylated cytosine residues were retained as "C". Therefore, in the mixed population of resulting PCR fragments, the ratio of band intensity of digested fraction to the combined intensities of both digested and undigested fractions reflected the levels of DNA methylation on the restriction sites.

Supplementary Data: Identification of bovine primary myoblast cells

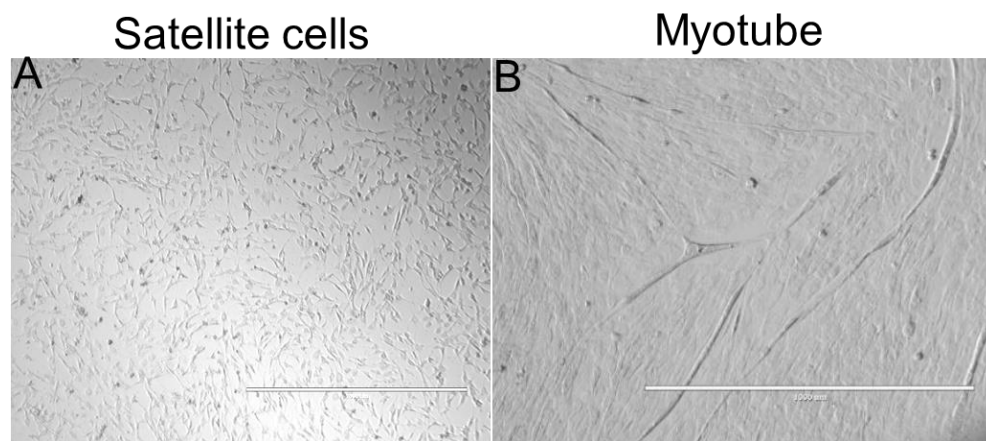

**Figure S3.** Identification of bovine primary myoblast cells ( $\times 100$ ). (A) Bovine primary myoblast cells cultured from bovine longissimus muscle. (B) The cells on the day 5 of induced differentiation.
